# Supplementary material for: Single electron transfer between sulfonium and tryptophan enables site-selective photo crosslinking of methyllysine reader proteins
Source: Research Square preprint supplement (doi:10.21203/rs.3.rs-3149584/v1), 2024-07-22
Supplement: Supplementary file 1 [file 75e78a263441f221f4b00d6c.xlsx]

## Sheet: H3K9_CBX1_W42
X-axis (m/z)	Y-axis (intensity)
1409.82	3
115.05	4337.9
119.05	9738.4
124.054	4502.5
129.09	6121.3
129.103	123692
130.087	20465.3
130.106	6652.8
136.076	207529
137.072	18235.3
137.082	9208.3
142.341	4280.7
147.113	34304.8
155.082	37664.4
158.093	4854.5
159.078	4767.1
165.067	15347.7
175.12	12889.1
181.605	4577
183.077	21436.1
183.112	4073.2
185.13	7264.2
186.125	8464.9
197.128	6732.5
199.182	7085.4
204.135	14078.7
227.659	8411.7
228.137	4253.2
238.12	7353.8
242.187	14949.4
249.16	69587.3
250.162	8476
261.155	28267.8
266.114	12586.7
277.155	18081.8
280.203	33606.9
281.206	12081.5
342.25	13179.8
345.227	4985.9
362.206	14535
365.665	3959.4
370.227	7334.9
370.738	4460.6
378.739	4815.5
379.237	5233.8
395.734	6782.4
399.238	7681.2
404.579	3854.1
413.293	5782
443.75	8811.1
446.748	12547.8
447.252	6956
449.234	18246.1
451.763	9313.9
452.264	6326
458.789	23601.3
459.289	12005.3
470.235	39347.2
470.611	10406.2
470.803	4379.7
471.249	15746.5
479.542	3947.9
489.155	4099.2
494.285	5441.6
494.782	5034.8
501.313	9149.4
501.795	7278.2
510.8	17641.6
511.298	10726.8
527.335	4765.7
537.314	6120.5
551.334	5894.5
567.339	43643.6
567.841	30628.8
568.344	9591.1
598.411	5220.8
599.41	5122.5
611.426	13327.3
612.426	4015.3
623.88	36378
624.379	27413.2
624.887	7197.3
638.399	9847
639.406	8350.8
640.416	10064.7
655.427	17791.9
656.427	8828.4
701.363	21946.6
702.372	5686.6
722.429	4650.9
723.393	4729.1
728.434	5481.8
739.441	7784.1
756.471	21329
757.474	6425.9
764.4	5413
766.461	5486.4
874.478	11466.6
875.472	5668.4
892.49	28172.1
893.492	14467

## Sheet: H3K4_BPTF_W2891
X-axis (m/z)	Y-axis (intensity)
1806.84	3
110.065	228728
110.072	5698720
112.087	1017560
113.071	433357
114.066	161940
114.733	137992
115.087	834453
116.017	1710840
116.071	1412650
116.077	134668
129.066	514620
130.098	176922
133.043	11617100
133.097	165044
136.067	196807
136.076	1843510
136.084	146469
144.012	1243480
145.097	299808
153.066	314621
157.108	315581
158.093	3025060
159.059	303978
160.054	1506960
161.038	2632530
166.061	388212
170.093	476684
172.109	393218
173.092	534269
175.119	16911600
175.135	571332
176.122	403171
178.065	16170200
179.067	979477
180.061	350659
180.078	232526
181.061	5671730
184.109	218622
185.105	2663600
185.605	447823
194.092	215138
195.088	1101800
197.104	329480
198.088	2634170
198.128	494069
199.054	575141
199.092	236017
212.103	444615
213.1	483741
215.114	1660570
225.099	338946
225.139	371835
226.083	438501
227.049	951359
229.13	2507730
230.113	399995
232.073	306409
232.141	18795500
233.144	1315910
244.075	971030
246.156	2996570
249.098	345747
261.102	330289
266.635	971951
270.091	444754
271.086	2082050
272.069	4054250
273.073	290020
273.137	383152
277.093	1337060
283.141	295576
284.103	545766
287.39	229773
288.113	1291010
289.097	10024300
290.1	1196990
291.157	397421
295.104	261558
299.677	230115
301.129	3744950
302.133	305297
303.178	391513
309.167	1216390
317.136	344476
324.066	421857
326.188	531579
330.178	384959
334.162	342664
341.091	338418
347.205	6552250
348.209	453597
351.189	246198
352.173	3086510
353.177	470770
354.181	838960
358.155	315176
368.102	335727
369.09	566766
369.2	21439700
370.203	3917080
371.207	340279
373.215	267614
375.144	535630
377.65	248290
385.13	1376170
386.112	2132300
392.699	241369
398.207	250072
401.217	233161
403.14	4357100
404.14	468413
406.213	347884
414.724	1845220
415.224	1403550
420.165	268630
423.238	927997
428.726	322861
429.738	366064
431.241	373279
437.197	329978
440.224	550374
452.224	271080
454.223	371882
457.256	1789310
457.312	243227
458.236	2513710
459.238	305210
472.232	1004870
475.263	16855500
476.266	3219250
497.224	1304780
498.227	300661
504.747	295993
514.25	353812
515.237	1919280
516.245	372484
527.254	336470
532.264	27745200
533.266	7094810
534.27	1055080
542.253	1289830
543.605	316340
543.94	478223
544.267	372411
547.918	355153
549.259	289834
549.772	466048
552.759	320385
553.262	477306
555.263	832204
555.602	426486
560.937	1490360
561.274	452462
561.611	302736
568.254	273227
576.742	487890
585.255	1096110
585.604	511918
585.755	541946
586.26	373473
591.276	368186
591.61	560053
591.943	944810
592.268	311200
593.769	1838800
594.265	858510
594.772	366982
596.955	1273700
597.282	2238900
597.617	1605120
597.949	954443
598.273	419120
602.959	2007000
603.288	1961540
603.622	520503
605.278	285775
607.279	999812
607.783	407071
608.288	423997
608.767	378160
616.28	433019
616.78	507027
621.276	357055
621.77	1338110
622.289	354327
627.767	297255
629.789	904713
630.279	1358680
630.788	974188
635.802	477969
638.298	353053
644.309	409835
644.801	542020
652.337	904174
672.836	342164
673.347	328160
680.846	1064740
681.349	1196030
681.842	335129
685.342	421883
694.337	1080410
694.848	1069490
702.861	10012800
703.363	8652260
703.861	3873950
709.353	334707
727.386	414798
729.865	560882
737.356	311241
737.873	1343260
738.375	1042400
738.873	969015
742.864	1056800
743.358	1131340
750.876	543194
751.374	3266220
751.872	3242920
752.369	1589150
759.883	14025100
760.384	13080200
760.884	5277610
761.396	399881
765.864	455759
784.406	1076390
785.402	340671
786.417	389246
804.447	453476
806.393	411801
815.396	1778760
815.899	1318080
816.429	2208700
817.43	351806
820.895	367065
823.915	1827550
824.418	1644500
824.914	559121
828.437	6951030
829.425	4039760
829.894	2717970
830.418	1240220
844.412	337557
845.466	8755510
846.473	3084860
847.469	1093930
873.455	1200640
898.436	345894
959.509	1370660
960.509	1052480
970.465	333052
971.448	787646
987.507	2422510
988.499	906993
1036.51	407396
1037.51	310049
1098.54	290454
1099.51	371404
1122.57	578806
1143.55	375624
1144.56	331354
1150.56	1254570
1151.57	328609
1256.6	343708
1344.63	444267
1362.66	401323
1438.66	428511

## Sheet: H3K4_JMJD2A_W967
X-axis (m/z)	Y-axis (intensity)
1810.91	3
111.172	594709
112.088	876203
115.086	724975
116.071	1374580
129.066	2100560
129.102	11853400
130.086	7900500
136.069	702611
136.076	9610750
145.097	919129
147.113	13604500
158.093	8277660
165.61	821978
171.077	2427800
173.057	1218120
175.119	25657800
176.123	1118010
186.088	7251450
189.088	1243560
190.083	1881800
196.113	2550490
198.128	36007000
199.072	1382640
199.131	2522880
200.14	4881050
212.104	1355280
217.083	7996640
218.15	9688700
221.093	2570150
225.139	11362000
229.13	6753010
230.112	1312450
235.145	1817770
236.107	980202
240.135	1261720
241.135	1009680
246.157	9178080
253.134	2349710
256.092	1493290
263.138	1156970
269.127	1892750
270.161	1424090
273.12	2208650
274.104	1697030
275.172	33385300
276.174	1437970
282.161	2060870
283.102	2732820
283.14	1072530
285.156	2082500
291.13	1904080
292.13	1605270
298.156	5209920
299.159	1435420
301.115	11763200
302.119	1907850
307.145	1221890
308.176	1661980
309.161	1476250
312.169	1288180
313.115	1101000
320.162	1558010
324.868	1205430
326.187	14308300
330.177	2044750
336.171	5774420
347.204	35396700
348.207	9178180
354.181	18118600
355.185	1818500
358.198	5623890
359.201	1321570
364.2	1863480
372.712	5962740
378.194	5248030
378.7	1802210
384.151	1440030
392.709	7141410
393.211	2651720
400.183	6600310
402.164	4338280
405.717	7064190
406.215	5656660
406.714	1196600
408.722	21104800
409.225	10742300
409.721	1620030
414.228	5276770
414.723	36232600
415.223	18714100
415.728	5392610
416.222	1696820
419.718	2025680
423.236	38548500
423.737	12691300
424.239	1790620
428.722	7893600
429.224	5920000
435.2	1403990
437.225	2363700
438.236	50284000
439.241	11278900
440.229	2546860
442.243	2826110
442.742	2388210
448.22	1910810
451.248	2289540
455.214	1246410
456.237	1658760
457.252	16378800
458.236	16694100
459.235	1785250
464.754	2728440
470.237	1556210
475.263	119379000
476.266	21942800
477.264	1945800
479.243	1533690
482.239	2058810
483.224	1776220
536.766	1829740
537.305	21003100
538.309	4666580
545.275	2046670
565.271	1942800
573.782	1616170
587.287	4943620
587.785	2140360
603.237	1539400
603.668	1276420
629.305	2875000
648.334	4915660
665.362	2271690
717.413	1633840
722.384	32785200
723.389	11996800
724.393	2333790
800.595	1535270
819.418	1319990
820.381	1749680
827.423	1637970
828.44	9708170
829.44	2845470
837.411	41466700
838.412	15818800
839.422	2535000
845.462	18087500
846.469	11917500
921.44	2342180
938.459	27106500
939.465	8583820
974.512	2086700
1545.04	1643320
1545.5	1542140

## Sheet: H4K20_JMJD2A_W967
X-axis (m/z)	Y-axis (intensity)
1621.87	4
115.086	215363
115.858	160646
116.07	692587
119.049	1296560
127.05	797765
129.066	1502220
129.094	289080
129.103	7551120
130.079	424187
130.087	7344710
130.096	490539
131.089	204375
136.076	16596500
137.042	197046
137.079	1510300
137.905	194743
141.066	408825
145.061	1597310
147.044	230939
147.102	498238
147.113	9014870
147.124	465860
148.116	415204
149.6	485158
155.045	354224
156.113	1781420
158.093	2159960
169.061	732695
171.077	489374
171.121	1378960
172.072	1840990
172.111	261808
173.056	2899570
175.119	11288200
176.123	644804
176.462	257772
176.622	324446
183.113	690865
185.165	533291
186.087	2662250
189.087	415699
190.082	2369330
193.097	578709
194.14	2969210
196.113	470819
198.128	1957550
199.071	580389
199.133	2387040
199.634	271589
200.139	1682340
212.065	257680
213.138	1776310
213.158	378949
217.082	3525180
218.123	463259
218.15	4914090
219.621	706309
221.092	4556170
221.644	773212
222.095	587998
225.139	4976120
235.145	1378710
236.108	659624
238.082	596186
240.134	2424530
242.166	7467190
243.169	622510
253.134	2360970
253.167	593565
255.11	454521
256.094	350476
263.858	253329
271.176	2546870
272.81	389995
273.12	1540800
274.102	551377
275.171	18763500
276.175	2631890
281.167	378543
283.104	1688760
285.156	452851
288.203	30207400
289.206	4424700
291.13	684067
292.129	1255010
293.133	367268
298.192	512927
301.115	2797630
314.2	4636230
314.704	1306510
315.209	444920
315.709	331426
320.161	1842580
320.197	310035
321.21	746122
324.18	472462
326.186	460574
328.716	20639600
329.218	7900140
329.718	1343010
334.202	2077920
334.715	707096
336.171	507923
337.151	725617
341.233	2282070
342.713	403837
343.213	2158150
344.218	618717
344.666	511608
345.169	360438
346.925	343221
353.202	444237
356.729	469456
361.723	506810
362.713	394715
369.226	634167
370.235	1926740
370.729	337979
375.719	2041350
384.151	445411
384.724	3645380
385.225	708295
385.729	361020
387.271	7156290
388.276	1525220
391.198	384391
433.228	367688
438.235	19078100
439.238	4099650
440.237	391894
441.745	1559400
442.241	1197960
451.442	344942
470.261	786385
470.754	438409
478.769	491814
479.266	654266
482.311	371853
525.78	426618
537.303	5085660
538.307	1289330
627.402	2075970
629.413	1358990
639.407	2336360
640.403	715187
648.337	1935150
649.339	645728
656.425	10294500
657.429	5150350
665.36	499525
705.359	1468420
706.359	721353
722.382	1906350
741.456	440305
768.46	526731
785.465	2489960
786.467	1428610
820.391	523895
837.409	1796920
900.504	711984
901.493	1201520
938.46	572307
957.52	721562
958.52	559161
1568.34	447819
1598.77	466105

## Sheet: H4K20_mORC1_W119
X-axis (m/z)	Y-axis (intensity)
2146	3
112.076	1582.8
117.058	2472
120.081	170065
121.084	10851.5
129.094	2413.9
129.102	42267.2
130.065	18477.4
130.072	1520.4
130.086	11868
132.073	1524.6
132.081	22495.2
132.906	1421.3
133.043	9971.8
133.061	3618.5
133.084	1922.4
136.076	24341.4
137.079	2656.2
144.081	1677.1
147.091	1795.7
147.113	18615.3
156.08	3562.2
157.061	2167.4
158.06	2413.5
159.092	196109
160.095	19111.4
170.06	25990.5
171.064	1876.2
175.087	35198.9
175.101	2170.9
175.104	3424.8
175.119	63203.3
176.09	3835.6
187.087	14687.4
209.092	9559.5
226.118	14348.8
227.174	2346.9
233.165	208678
234.168	26387.4
243.145	2913.1
244.129	15194.5
248.07	4908.7
248.108	3282.4
250.123	10693.1
251.102	4096.1
260.107	10256.2
261.157	139762
262.16	11985.2
271.176	3846.8
272.087	3092
276.064	5602.4
277.131	8493.6
279.097	10399.7
283.862	2264.1
288.203	52007.5
289.204	3172.7
305.128	39970.7
306.129	3781.4
306.16	37761
307.162	3900.4
322.155	62965.3
323.161	3831.8
334.155	36651.6
335.157	4372.1
341.147	2622.9
350.151	5797.1
363.097	3859.1
376.184	24571.1
387.228	2986.3
387.269	20370.9
402.216	3134
430.14	5521.1
439.127	5823.3
447.239	5218.9
448.151	16250.6
449.155	3927.7
465.179	13569.3
530.302	5468.9
566.949	3111.1
587.813	4765.9
627.399	4608
631.331	3341.5
631.833	4790.6
632.177	3117.9
639.396	16596.4
640.401	5737.5
641.191	3546.4
656.422	11515.9
657.428	3480.3
694.331	4496
702.834	3477
703.335	3125.7
703.842	3351
711.345	43778.1
711.844	32208.5
712.349	4348.7
734.807	3209.5
760.846	3875.8
768.859	45142.2
769.359	27758.6
769.86	11058.7
799.448	15771.9
800.459	9069
827.268	3899.5
838.859	3278.5
841.385	4765.7
841.877	10591.1
842.386	5383.4
850.391	63581.3
850.892	49868.2
851.393	25523.7
851.908	3081.2
897.466	3401
914.477	14294.3
934.92	15024.7
935.42	16767
935.921	5857.8
943.426	30926.6
943.932	46157.9
944.432	11612.3
1001.5	5292.6
1016.96	11374.2
1017.47	11098.4
1024.54	4407.5
1043.56	4699.7
1059.59	48144.1
1060.59	19373.4
1061.6	3554.2
1116.53	5087.6
1161.54	12909.4
1162.55	12710.7
1174.62	15193.1
1175.62	3971.8
1244.65	4630.9
1245.63	3223.7
1261.65	17274.3
1262.65	13825.9
1263.68	3769.9
1276.54	17334.8
1277.57	12958
1302.56	3793.1
1324.59	3676.9
1391.64	4243
1392.6	3745.3
1404.64	5102.2
1409.61	4197.3
1421.68	14178.8
1422.68	6060.7
1439.64	18110.3
1440.63	16998.4
1518.69	3761.5
1520.67	3733.3
1536.7	29915.5
1537.71	15363.3
1538.71	10341.7
1550.77	3964.1
1555.69	3725.3
1625.71	14673.5
1626.71	5126.9
1699.77	5179.5
1773.83	4007.8

## Sheet: H4K20_mORC1_W87
X-axis (m/z)	Y-axis (intensity)
1331.79	3
112.087	31628.3
115.087	27305.1
116.07	75298.1
117.095	18319.9
117.102	390833
120.074	7194.9
120.081	118068
122.113	8976.2
130.097	26261.3
133.097	10383.1
138.394	8811.5
140.022	10540.4
142.097	65041.4
148.251	9496.1
149.045	113934
149.053	8850.8
152.07	56031.7
154.914	9178.3
156.113	79817
157.108	23811.8
158.092	214205
158.734	12068.4
159.447	10961
175.119	1081460
176.122	66384.6
180.514	11657.7
183.112	15189.5
185.166	16189.4
194.081	199542
200.138	34100.9
211.107	252703
213.138	12211.7
219.149	110977
225.042	35164.3
225.139	92048.4
228.134	292944
228.169	14520.2
229.136	26565.7
242.165	22190.5
242.962	14614.1
247.145	24796.1
257.16	131884
271.177	196915
272.179	20267.9
274.187	155420
275.189	13419.6
288.201	106280
314.202	27912.1
324.987	15590.8
325.985	13918.5
328.682	21786.3
328.716	152047
329.216	90727.6
337.195	23813.6
341.018	250373
341.236	20722.5
342.018	73645.6
342.998	16044.6
344.984	13511.9
359.027	358002
360.029	90841.5
366.231	27144
370.241	20236.3
373.978	15839.9
383.74	69907
384.233	66559.7
384.732	25619
386.22	26136.9
387.272	73131.8
392.747	21466.5
395.241	86258.7
395.741	18980
402.248	59059.9
404.228	86478.9
405.576	26191.2
405.91	30323.1
407.74	23014.2
421.255	667389
422.258	202503
423.26	29435.2
450.758	34432
456.273	20664.3
516.479	18222.3
536.316	33850.6
536.815	23588.4
544.325	83297.2
544.828	29748.5
548.421	17373.6
552.837	1421770
553.338	1090990
553.84	461823
554.341	77081
554.844	21013.7
599.354	20387.1
607.866	25192.7
608.355	163379
608.855	108774
609.361	84336.6
616.866	168127
617.371	128930
617.868	72600.7
618.371	23018.9
622.37	34460
639.397	289881
640.401	106022
641.407	24743.7
656.424	478124
657.429	231832
658.431	35927
673.38	78024
690.406	147168
691.411	59356.1
725.433	18378.4
789.479	63091.7
790.481	27259.1
795.447	60479.7
801.456	34364.5
803.49	32451.3
814.46	26325.5
817.469	110892
818.475	93155
831.491	95551
832.494	71569.5
884.548	22951.8
902.561	239068
903.563	151733
904.567	27663.5
914.534	20291.8
930.543	108197
931.559	92802.5
948.553	35976.5
1013.58	28228.6
1279.16	21322.9

## Sheet: Cell_PHF2_W29
X-axis (m/z)	Y-axis (intensity)
1992.93	4
110.071	60440.6
115.086	5459.2
116.017	6576
116.071	4349.9
120.081	11424.3
129.102	12975.7
130.05	22963
130.065	15659.4
133.043	15720.9
133.061	12642.8
136.076	39333.8
137.079	8584.4
141.067	6252.3
143.118	16543.7
147.113	12376.3
148.06	88150.9
156.077	13618.8
158.092	6453.8
159.091	10971.5
171.113	6825.3
173.13	7200.8
175.119	31338.4
178.052	5720.2
185.165	32305.4
201.124	14709.7
212.102	5284.5
213.16	9692.8
217.083	20205.8
220.927	5307.8
229.13	13981.3
235.093	70164.8
236.097	6501.7
246.156	15432.7
258.145	6740.5
262.15	12854.5
285.134	8561.6
287.14	4764.7
288.096	4235.3
307.145	8990.7
310.114	11087.9
321.068	5886.6
328.171	5011.2
347.205	13077.9
352.171	7652.5
378.181	8887.8
386.174	5239.3
391.043	4820.4
417.19	4556.7
420.704	10219.8
439.189	5084
458.236	7027.3
470.149	5575.2
474.211	10819.2
474.706	5594.3
475.263	40335.8
476.269	13019.1
479.228	8141.5
494.21	6795.2
496.224	15117.2
499.298	10354
499.777	10411.8
517.239	5112.3
522.204	5141
529.751	5030.6
531.233	15360.7
536.251	23518.8
544.734	11173.9
549.308	6250.7
553.244	13934
560.278	17597.9
561.278	14555
562.289	5570.3
579.293	12156.3
649.332	15374.8
653.357	5375.1
659.35	6312
665.321	11199
665.816	9508.4
667.296	6457.1
673.841	6571.2
699.833	9777.1
700.331	5789.4
703.338	25016.5
731.343	20691.4
731.844	17295.7
732.324	5675.6
745.337	18336.9
745.836	17807.7
746.333	14070.2
760.367	10346.5
778.38	13085.4
780.877	5970.1
809.385	6146.1
809.884	6936
810.386	5850.9
823.382	15778.8
823.883	16696.3
843.471	12546.3
845.463	17472.1
846.469	13392.5
847.459	5172.1
991.438	8076.6
1003.49	5477.1
1016.79	6209.4
1020.53	16770.3
1021.53	7536.7
1105.49	7438.8
1196.26	7020.2

## Sheet: Cell_TAF3_W889
X-axis (m/z)	Y-axis (intensity)
4210.97	4
115.086	34131.3
115.774	6981
119.05	13258.6
129.066	7720.6
129.102	59175.8
130.05	12943.9
130.065	9731.9
130.086	67643.2
131.081	8445.6
133.061	152376
136.076	500362
137.079	32860.9
139.087	11154.3
141.066	10150.4
143.082	48169.5
143.118	7158.4
147.076	25215
147.113	127086
155.081	11818.6
157.061	12857.2
157.097	59410.2
159.077	18731.5
159.091	60454.6
161.039	10223
167.082	83506.9
173.127	9351
175.108	75426.5
183.111	9343.2
184.108	10034
185.093	74147
185.165	1222740
186.168	127955
187.071	33705.1
193.098	17380.3
197.165	10602.7
199.181	41840.9
201.124	14034.8
202.118	15563.5
203.103	66262.1
204.098	74179.2
204.138	8169.8
205.101	8003.5
210.086	12059.5
211.18	18777.9
212.104	24664.6
213.16	367710
214.085	10888.7
214.118	34681.7
214.163	57082.3
223.108	16173.3
225.16	15254.7
227.175	16885.9
227.446	10270.5
228.098	120353
229.101	9999.6
230.113	19332.1
242.114	18210.7
242.15	16671.3
242.185	10801
250.118	13268.6
252.17	17681.8
256.13	9646.2
260.069	29751.2
260.124	17303.9
260.197	125346
261.124	10241.3
261.198	17076.4
265.117	11722.8
270.108	18136.8
270.181	93619.8
271.186	17557.4
275.136	18290.9
278.114	42645.7
279.114	8221.1
280.166	61359
281.167	8234.4
283.14	23962.3
298.177	72655.6
299.21	11592.1
301.111	12510.1
301.151	109590
302.154	13986
303.207	14675.5
312.155	9057.8
319.164	12680.1
320.13	9599.9
327.202	41359.4
328.205	8054.5
330.145	18289.7
331.201	27709.9
341.145	26106.3
347.158	55303.5
348.157	21616.2
349.189	44935
350.189	9329.7
354.177	12098.6
359.157	9958.7
361.152	21088.1
362.157	13376.8
363.203	17921.4
377.18	33716.5
379.163	29492.2
383.267	15192
391.198	34770.4
398.17	11427
404.16	16261.8
411.26	30541.2
412.184	21027.9
416.176	66353.2
417.177	9793.3
430.197	11091.3
434.12	15009.2
434.187	50376
434.251	8819.6
435.188	13834.1
436.192	8668.4
457.28	7762
460.217	15649.8
462.158	7383.7
462.274	75717.9
463.273	14816
464.211	14441.7
475.139	7840
483.219	13556.8
484.181	8554.5
490.269	20706.2
492.124	14768.1
501.23	9273.5
504.211	8589.8
505.148	12525.8
523.233	17357.2
530.254	9528
530.755	12198.4
539.319	38262.1
545.224	9629.3
547.192	12458.3
548.234	7773.1
551.249	16984.9
561.235	10766.3
562.186	10113
563.156	8867.4
564.751	9300
569.257	35609.1
570.253	8884.4
573.221	10018.4
573.764	16057.8
575.243	12725.3
579.242	69082
580.246	22566.2
589.242	8592.1
591.313	8985
597.254	40341
598.256	17927.2
599.277	12350.1
602.228	9770.9
603.32	11666.6
605.201	16989.5
606.784	12418.6
612.284	8188
618.239	12558.4
621.295	7675.2
634.2	10650.1
636.318	13580.8
646.79	9793.5
648.256	10668.1
650.312	11152.5
650.804	17426.2
655.29	26189
655.801	10858.7
660.277	13786.9
664.308	15014.9
672.343	16453
673.248	44700.7
674.264	18266.9
675.257	17286.8
676.234	22753.1
678.253	12765.9
679.31	13778.9
687.22	18037.6
688.221	10058.4
689.346	12272
691.271	29509.9
692.269	12125.9
698.838	12775.4
703.213	20134.7
703.82	10877.7
704.348	15368
705.23	13614.6
706.846	12709.6
707.337	10901.5
708.335	11034.4
711.845	10731.1
713.339	14643.2
715.217	9258
717.31	14294
718.27	13511.1
719.851	15326.3
721.225	20967.7
726.36	11470.4
726.854	15313.2
728.847	16663
729.232	12705.9
729.371	12643.1
731.375	12366.1
733.232	10386.8
741.358	8535.6
745.275	18083.8
746.266	28129.3
747.336	27202.1
747.85	13358.9
749.27	11665
756.253	27116.3
757.248	12299.9
758.289	9781.4
759.384	69549.6
760.372	32501.4
761.363	20250.2
761.875	23860.3
762.373	36389.3
762.876	13445.1
763.288	12048
764.262	45418.3
765.277	24706.3
773.31	12389.1
774.252	148923
775.249	51877.1
776.249	24953.7
788.293	16185.6
789.312	28466.9
791.334	19045.7
792.263	149960
793.262	45305.5
794.257	16487.4
798.397	11460.5
799.394	18509.2
803.88	19808.6
804.366	14478.5
806.327	29107.4
812.889	10451.3
815.341	10931.5
816.321	40872.3
817.358	16662.4
818.34	28511.4
819.374	26230
819.892	26478.5
820.362	10410.6
827.904	63089.2
828.402	73042.9
828.903	35724
829.399	15268
830.365	10556.3
831.376	11662.7
832.337	15322.5
834.326	50085
835.34	14273.1
839.372	13101
841.319	14500.9
842.33	23493.3
843.352	13865.9
846.402	36798.3
847.425	19685.9
848.401	19590.4
849.361	15887.2
850.368	15035.5
858.366	16461.4
859.354	36099.7
860.344	53437.4
860.925	12061.9
861.354	26659.7
867.365	12350.6
869.427	29092.6
869.907	12470.6
870.339	10675.2
872.454	21776.8
873.442	13477.7
876.386	17305.5
877.355	85851.5
877.935	18840.9
878.361	42032.5
879.365	19127.3
887.337	154602
888.34	66510.7
889.364	32966.9
890.354	16160.3
891.395	12034.7
895.403	15050.6
898.405	12143
900.427	11721.7
903.404	14645.4
905.347	137112
906.35	60648.1
907.358	27559.4
913.396	18000.2
914.393	10967.2
915.42	25345.2
916.416	14420.4
917.424	17369.7
919.408	15585.3
922.41	13036
926.456	11587.4
927.408	13796.1
929.39	34136.2
930.395	15848.6
931.404	20432.7
932.411	11316.2
933.462	59710.1
933.975	40988.2
934.473	67706.3
934.973	34232.9
935.456	20956.6
940.432	13288.6
944.432	20935
947.406	26691
948.429	25296.7
950.427	19715.9
951.437	16737.9
953.795	12877.3
954.439	19944
955.427	11035.8
956.412	12766.4
959.447	16673.3
965.443	14021.5
967.433	21071.3
967.939	16709.7
968.452	15927.9
969.455	14030
970.433	16883.5
971.435	16572.3
972.432	23984.1
973.436	38636.6
974.422	13924.1
975.437	15388.9
979.457	43292.6
980.461	23842.1
981.45	12291.4
982.428	16652.7
983.435	11366
984.434	33964.1
985.431	16162
986.457	12890.4
988.466	10632.7
990.452	60977.7
991.452	30357.7
992.462	16365.4
995.448	18206.3
996.467	11519.8
997.452	55580.8
998.459	36489.3
999.461	11931.9
1000.42	96823.2
1001.42	41420.6
1002.44	35262.8
1003.43	31316.5
1004.46	18496.8
1006.45	11609.5
1007.47	18892.5
1012.48	22105.5
1015.47	13337.7
1016.44	12313.5
1018.43	90063.5
1019.45	36783.1
1020.45	34393.5
1021.46	18434.9
1022.48	15042.3
1024.45	15621.5
1025.45	10665.2
1026.46	10988.6
1030.47	15945.5
1030.82	12346.2
1032.48	16043.1
1033.96	15615.8
1038.48	14619.8
1039.46	21145.4
1039.96	19662.7
1041.47	35288.1
1042.48	25225.4
1043.47	14147.3
1047.52	24283
1047.85	35598.8
1048.18	57100.1
1048.5	48470.1
1048.84	14550.3
1049.48	27643.8
1050.51	19112.7
1051.48	24546.6
1053.52	77867.7
1053.86	124569
1054.19	157315
1054.52	113293
1054.84	21002.8
1055.48	19652.8
1059.48	53371.5
1060.48	48535.1
1061.48	21425.1
1064.97	18030.9
1065.48	23579.9
1068.49	18822.7
1068.98	16827
1069.48	29835
1073.49	39738.3
1073.97	25625.5
1074.47	22638.7
1076.51	32375.1
1077.49	81606.5
1078.02	17232.2
1078.49	49269.4
1079.51	18756.1
1080.51	19886.6
1082.47	35303.9
1082.97	48896.4
1083.47	53528.2
1083.98	22315.3
1084.5	15849.6
1087.48	42857.8
1088.06	12187
1088.5	18000.3
1091.48	28653.3
1091.98	19434.6
1092.48	25279.8
1094.51	29932.1
1095.49	27216.5
1097.53	18287.5
1098.07	15285.9
1098.5	15914.9
1099.46	34636.7
1100.47	20831.5
1102.52	12476.6
1103.52	18665
1105.47	21270.3
1106.49	20653
1112.49	26909.7
1113.5	14555.4
1114.52	19697
1116.49	75372.8
1117.49	43342
1118.08	22469.8
1118.5	29118
1119.49	14033.7
1120.49	20104.9
1123.09	14913.9
1123.55	15568.5
1124.51	14791.4
1128.51	28457.9
1129.51	20440.2
1130.55	41006.8
1131.04	43619.2
1131.56	57315.7
1132.06	62985.1
1132.55	35059.1
1133.06	23706.9
1133.56	25759.8
1134.52	14475.6
1135.53	14474.1
1136.54	17080.6
1137.02	14495.6
1137.54	21306.7
1141.51	26155.2
1142.01	15598.8
1144.5	23324.6
1145.52	22726.3
1146.51	79385.4
1147.52	46887.4
1148.51	15930.8
1150.02	18426.3
1150.51	25338.6
1154.55	15764.8
1155.52	38010
1156.01	27796.2
1156.52	17360.2
1159.54	34890.6
1162.53	13933.9
1163.53	26769.8
1164.01	33656
1164.52	138710
1165.01	36268.4
1165.51	64589.9
1166.53	28337.5
1173.01	21081.5
1173.53	27407
1174.03	20477.5
1174.56	18148.7
1179.55	22363.7
1180.55	17077.4
1181.56	37701.6
1182.55	18514.8
1183.55	31465.6
1184.55	26630.3
1185.53	17211
1187.56	34709.8
1188.08	25461
1188.56	21081.5
1189.57	24077.2
1190.09	13349.1
1190.57	30251.5
1191.57	17229.3
1194.54	19382.4
1196.57	33408.9
1197.58	19097.6
1198.54	19470.2
1199.58	19870
1202.55	19634
1203.56	14482.3
1208.59	26185.7
1209.58	28462.4
1210.55	15602.2
1211.55	19576.8
1212.54	33882.3
1213.56	31476.4
1214.56	14116.6
1215.55	29949.3
1216.56	14254.5
1217.56	20637.8
1222.56	43346.2
1223.55	35182.9
1224.57	18939.2
1225.57	41830.3
1226.54	45325.9
1227.52	57915.9
1228.53	37719.8
1229.56	24293.8
1231.58	20313.9
1233.11	24313.7
1233.61	37604.2
1234.1	17764.8
1238.58	18358.2
1240.57	66364.8
1241.56	56842.8
1242.58	26293.1
1243.6	28200.8
1244.54	74396.1
1245.55	56618.3
1246.59	31213.3
1247.59	35073.2
1250.59	20359.7
1256.59	38472
1257.05	30335.9
1259.6	31903.7
1260.6	40816.1
1261.59	22096
1268.63	20434.5
1273.14	37687.5
1273.63	33739.1
1274.14	18652.1
1276.63	32610
1277.62	47715.9
1278.6	30080.7
1280.6	19908.5
1281.65	215809
1282.15	295770
1282.65	253018
1283.16	135527
1283.63	45372.3
1286.6	26009
1290.61	22888.7
1293.6	27041.4
1294.62	37143.9
1295.62	22066.7
1297.6	22647
1298.13	17248.9
1298.6	23302.8
1299.58	45261.1
1300.6	61848
1301.61	32635.8
1302.13	27610.7
1302.6	48843.3
1303.1	26734.3
1303.62	27092.8
1304.1	17568.5
1304.62	23227.7
1308.62	24599.9
1309.13	24398.3
1309.59	83139.3
1310.17	17406.2
1310.59	80753
1311.6	56690.7
1312.58	25762.1
1317.61	22615.2
1318.11	33548.2
1318.61	24408.3
1319.63	19938.1
1320.13	17775
1324.64	29193.9
1325.65	20317.2
1326.14	32408.1
1326.62	59127
1327.15	49390.8
1327.6	192847
1328.62	211420
1329.62	95376
1330.6	48223.1
1331.6	23388.1
1340.64	22217
1344.15	35626.6
1344.62	41398.5
1345.63	21393.2
1349.62	28169.4
1350.64	23757.3
1352.64	45570.2
1353.15	67833.3
1353.61	69794.6
1354.13	36370.5
1354.62	45443.6
1357.62	60143.1
1358.18	19197.2
1358.64	76926.2
1359.16	30835
1359.61	39647.7
1360.64	22127.5
1362.66	17972.7
1363.18	51031.5
1363.68	67197.2
1364.17	59058.3
1364.67	49281.7
1367.66	20751
1368.65	17680.2
1372.17	38247.7
1372.67	69354.8
1373.16	61331.9
1373.67	42720.9
1376.67	19450.9
1377.68	33464.2
1378.67	24384.6
1381.67	20177.9
1382.16	22815.7
1390.66	18775.6
1401.67	23229.7
1406.68	46487.2
1407.2	52352.2
1407.69	75093.7
1408.19	28383.7
1408.69	21335.4
1409.68	46795
1410.18	26495.3
1410.67	28381.5
1411.17	42749.9
1411.67	27762
1412.67	17966.4
1415.21	17987.8
1415.7	34462.9
1416.2	26706.6
1416.7	25026.6
1419.17	30837.6
1419.67	37450.4
1420.16	26523.9
1420.63	18470.6
1422.67	41931.8
1423.68	30810.3
1424.71	46432.8
1425.17	28468.2
1425.66	60111.9
1426.16	42695.3
1426.67	40024.4
1430.2	47867.8
1430.7	39503.8
1431.2	32294.4
1431.67	17559.7
1434.66	22201.1
1435.18	25459.8
1438.7	30030.7
1439.17	24343.8
1439.67	131554
1440.17	37700.3
1440.66	113060
1441.65	58734
1442.68	44012.5
1447.68	43275.4
1448.18	70988.3
1448.68	68515.7
1449.18	52753.3
1449.69	39011.4
1450.21	19385.8
1450.71	29415.8
1451.19	19815.7
1451.71	30436.4
1452.71	20534.4
1453.69	20497.8
1454.17	19590.9
1456.7	71337.1
1457.71	64881.7
1458.7	40134.1
1462.7	20394.2
1463.2	21411.4
1466.23	22196.9
1469.69	20090.8
1470.7	25147.9
1471.21	20800.9
1473.2	18338.1
1473.7	23812.3
1474.19	23228.2
1474.69	23722.5
1475.19	21509.4
1475.67	25397.1
1478.73	48768.2
1479.22	91048.1
1479.73	77626
1480.23	40195.6
1480.72	32297.7
1482.21	21619.4
1482.69	84421.9
1483.18	95977.7
1483.69	105058
1484.18	41980.5
1484.69	31893.4
1490.73	16956.9
1491.2	100527
1491.69	191239
1492.2	171526
1492.69	87171.9
1493.19	46404.2
1493.69	36203.3
1494.7	22074.2
1504.74	21056.6
1508.73	27604.6
1509.7	27412.6
1511.69	27235.1
1512.73	16641.1
1513.25	19500.9
1513.77	71468.1
1514.23	53821
1514.74	53283.4
1515.24	27886.4
1519.73	25183.1
1522.23	166745
1522.74	407307
1523.25	343943
1523.75	227991
1524.25	90712.3
1524.75	40663.1
1539.23	27153.5
1539.74	56378
1540.23	24864.9
1540.74	50718.8
1541.23	22133.8
1541.72	40697.5
1547.73	52359.4
1548.24	78272.9
1548.74	91893.9
1549.25	34624.5
1549.75	25700
1553.74	40987.5
1554.77	30850.6
1569.77	44614.6
1570.78	46198.4
1571.78	26070.4
1596.25	24162.5
1596.77	23201.5
1597.26	22348.8
1597.77	46082.8
1598.28	24990.5
1598.76	19084.7
1604.26	24724.4
1604.78	36098.5
1605.29	29416.4
1605.8	24261.1
1606.78	21783.7
1624.76	47836.2
1625.76	33730.7
1637.78	40213.4
1638.79	31898
1639.78	32054.9
1654.8	81842.9
1655.78	84449
1656.74	47665
1657.79	24861.2
1737.82	39708.3
1738.84	37811.7
1866.93	39022.4
1867.92	26784.7

## Sheet: Cell_KDM7A_W61
X-axis (m/z)	Y-axis (intensity)
2107.95	3
110.071	83743.8
111.075	10343.9
117.066	7386.1
119.049	16583.8
129.066	26704.6
129.102	57423.7
130.065	203365
131.069	42431.9
132.081	13998
136.076	593391
137.079	106591
143.118	24302.6
145.06	70378.3
146.065	6456.5
157.097	11832.2
159.075	14598.8
159.092	265748
160.095	70396.8
162.087	62237.5
163.092	9107.9
169.061	12280.4
170.061	7289.7
171.113	8179.3
173.128	204823
174.132	33843.4
175.119	13539.5
185.093	5495
186.067	4499.1
186.087	109188
187.088	34558.3
201.123	49963
202.127	10831.9
203.104	7356.4
209.104	13389.7
219.081	10849.8
225.098	11433.9
227.463	6771.9
229.097	5462.2
235.118	6149.8
235.144	33593
236.149	7946.1
244.127	6409.8
246.126	10269
246.156	9625.1
247.076	9354.3
247.109	17148.6
248.109	12098.5
255.109	7357.2
258.145	65938
259.148	14064.7
260.141	24365.8
261.142	13444.1
263.138	8536
264.136	14673.3
272.124	20996.5
273.12	96917.4
274.12	43633.5
281.148	6157.7
288.134	24896.8
289.138	9898.7
292.128	9150.6
296.136	7032.6
304.13	13411.1
306.12	8675.1
313.132	7783.7
324.13	47660.5
325.136	16169.1
329.22	16168.1
331.144	6977.6
348.17	8908.1
349.155	11640.4
350.15	8486.8
359.157	11430.2
374.217	13601.4
375.22	7708.9
379.175	5939.3
381.335	5527.9
394.158	7387.9
411.161	27852.1
411.673	10956.6
412.172	18353.8
413.171	6286.3
414.181	6461.2
420.681	8254.3
421.178	7452.6
421.693	5984.4
422.198	9257.2
426.683	8510.4
427.188	13281
435.69	10449.2
436.188	33072.5
436.693	9110.8
437.185	10752
442.177	13809.7
443.177	6156.7
450.207	8117.7
454.206	7450.4
458.747	10459.7
459.198	12656.7
460.201	8597
462.21	7549.1
464.184	32381.1
465.193	20855.5
465.715	6284
470.205	17536.9
470.705	22274.6
473.286	12470.9
474.289	6605.9
479.205	9698.6
479.708	43698.8
482.199	44238.7
483.2	27953.5
484.223	6895.4
490.209	13182.5
498.719	18518.9
499.217	32758.8
500.219	8571.7
505.212	7489
507.23	8336
507.727	19786.5
508.228	15176.1
516.735	19938.6
517.229	7727.9
518.226	12145.4
535.252	8125.2
539.247	8950.2
544.321	44951.7
545.324	28824.8
546.227	7333.9
546.326	11426.8
551.733	11583.8
555.251	6157.4
558.247	12188.1
560.256	14153.4
560.745	14306
561.251	11308.2
563.246	15401.1
563.744	10900.1
565.235	25931.8
566.243	21494.2
567.245	13105.4
572.246	17208.8
573.773	8119.5
574.279	6521.6
583.247	51781.9
584.25	37896.1
584.592	12030
585.249	10675.4
601.252	7870.7
613.263	7996.1
622.263	16792.7
623.263	7455
630.282	8103.4
631.275	7971.7
633.245	6596.9
635.771	13044.3
636.62	23016.2
637.313	15634
637.819	19456.6
638.318	19778.8
640.277	7490
644.765	8448.5
645.275	14656
648.269	36499.5
649.278	30996
653.783	44047.3
654.281	20229.9
664.297	9294.6
666.285	74600.9
667.286	71544.7
668.285	10909.2
674.314	17116.2
684.295	56322.2
685.299	63025.4
686.31	16524
687.3	7900.9
688.279	8112.6
694.317	8639.1
694.832	12176.3
695.338	27355.7
695.837	17071.3
696.331	9095.1
703.308	18321
703.426	15906.6
704.419	8283.1
705.314	8053.6
707.384	73138.9
708.388	38563.6
709.384	20318.5
717.338	6550.4
724.311	6982
727.315	7262.8
744.334	14231.5
745.327	8141.1
752.34	11177.8
752.845	23456.1
753.342	24800.2
753.838	8856.4
754.323	8194
756.342	13018.4
766.347	8041.9
771.343	8205.4
772.341	10569.8
782.342	7311.3
783.357	8124.1
784.341	11200.9
808.36	12293.9
809.374	19444.2
810.339	32603.2
811.342	34520.2
812.343	10660.6
818.361	30583.5
818.865	52479.8
819.369	22507.7
820.366	10074.6
824.364	12586.1
825.362	15957.6
827.359	15251.8
828.351	23640.6
829.349	32969.4
830.354	13135.9
835.331	8069.8
836.357	9837
842.381	15436.2
843.377	18971.9
844.426	26740.7
845.439	25808.9
846.431	7626.6
852.362	47073.6
853.364	75266.3
854.372	31338.6
858.368	11131.2
859.386	14190.4
867.375	18737.3
867.874	9726.8
868.36	9415.5
870.372	44754
871.378	74688.5
872.374	27764.6
875.885	32793.4
876.379	100159
876.879	51305.2
877.373	20845.9
877.897	7738.2
911.404	8349.5
914.378	10323.3
915.468	11581.6
916.482	16856.7
917.47	12095.8
925.908	17105.1
926.418	12441.2
928.387	12707.6
929.413	20119.8
930.404	10185.1
931.406	8471.1
939.404	27396
940.403	41075
941.397	15187.4
942.408	9434.2
945.416	22126.9
946.424	11996.4
947.431	9553.2
953.421	10222.2
953.927	33173.2
954.427	85385.8
954.923	51194
955.427	24377.2
956.42	13511.7
957.4	38989.5
958.414	62847.5
959.416	22705
970.43	12910
970.933	11673.7
971.432	17405.8
996.42	26429
997.423	41878.4
998.422	22551.8
999.438	9841.6
1013.45	14583.6
1014.44	29015.7
1015.43	41357.3
1016.43	24402.2
1017.43	17317.7
1028.47	8012.9
1030.48	14156.2
1031.48	36314.2
1032.46	54269.3
1033.46	21621.1
1057.47	10797.1
1063.42	7964
1100.48	12310.1
1102.47	10055.1
1107.49	10442.5
1108.47	10870.8
1114.49	18513.7
1115.5	33012.2
1116.49	16751.1
1117.51	9488.9
1118.49	17792.6
1120.49	12234.3
1124.46	9387
1125.48	28062.3
1126.48	14448.1
1132.5	13025.1
1142.49	72590.1
1143.49	259944
1144.49	111656
1145.5	40005.7
1146.53	31985.9
1147.55	14832.2
1183.52	16295.5
1201.52	21967.5
1202.51	19087.1
1219.53	9002.3
1226.56	8710.1
1240.56	8424.2
1242.55	8480.5
1262.56	13372.4
1278.55	15594.2
1279.54	9242.9
1306.54	44079.8
1307.55	28086.6
1308.56	10205.1

## Sheet: Cell_ING3_W385
X-axis (m/z)	Y-axis (intensity)
3765.84	4
110.071	11306.8
114.091	21459.1
130.065	39670.3
132.424	6265.6
136.076	81397.8
159.092	116340
159.113	462609
160.117	13867.3
173.128	12226.4
175.119	25357.9
181.097	21763.2
183.113	18389.3
187.108	114086
188.115	8043.3
200.14	47475.9
212.101	6570.6
216.098	10839.4
228.134	29697.1
233.128	352874
234.132	16931.4
258.16	12943.2
261.123	185481
262.152	24977.2
275.104	7967.1
278.15	14478.9
286.154	9944.5
287.151	6132.3
292.13	74447.2
297.155	13628.2
299.517	6078.2
315.169	12727.7
326.14	6489.4
330.143	8677
330.292	6346.7
361.189	12152.6
389.182	233922
390.186	13675.8
390.243	6573.4
391.196	17264
410.241	7113
436.211	7981.3
452.221	6054.2
460.257	18285.9
487.93	6274.2
488.25	63271
489.258	10862.7
516.214	7446.6
547.292	8331.5
553.307	7358.1
575.283	22340.6
612.297	7441.4
640.602	7092.3
670.357	15472
688.376	11592.6
756.356	8153.1
788.608	6629.5
792.889	9920.7
817.373	6919.6
826.393	11170.5
826.642	10471
838.661	6676.3
846.387	8847.2
849.403	6335.5
867.406	11266
867.652	7364.5
872.382	6977.3
873.914	9451
874.166	7907.3
875.407	8978.5
890.713	9277.2
890.939	9908.5
891.424	39300.2
891.671	49339.3
891.894	12227
895.198	20988.7
895.446	27815.3
895.699	14513.2
895.93	201387
896.177	95550.7
896.401	10875.5
913.482	7637.9
921.427	7916.3
926.117	9610.3
927.101	16007.5
927.435	11337.8
929.459	7006.4
936.767	14067.8
940.986	20939.9
941.516	67314.6
942.501	21708.7
959.112	12107.8
959.454	16427
959.78	9145.5
964.125	10580
964.469	11604.6
965.123	42433.3
965.444	14211.9
965.786	8919.2
969.794	21378.4
985.121	7488.4
988.49	11365.8
989.459	17165.1
993.117	10901
994.122	8242.2
996.491	11113.8
996.795	12043.2
997.148	10858.4
997.473	8459
1001.84	11343
1002.81	46183.8
1003.14	19218.4
1012.47	12899.4
1014.16	7744.8
1020.47	11258.8
1021.5	9127.7
1022.49	13218.3
1023.81	10165.6
1024.51	7106.7
1024.85	10196.2
1025.82	22209.3
1026.14	46661.3
1026.47	22814.3
1027.5	8684.1
1030.16	11840.9
1030.51	23088.4
1030.84	33451.3
1031.18	25838.4
1031.52	23258.9
1031.82	187409
1032.15	87795.8
1032.44	10906
1035.8	11100.3
1037.15	11009.7
1041.48	9988.4
1053.17	16191
1053.48	11671.4
1054.18	10813
1055.5	12432.1
1056.86	11660.7
1057.51	10291
1058.19	10634.4
1058.53	9872.8
1058.84	35065.3
1059.17	51133.8
1059.5	33793
1059.8	9284.5
1060.15	10885.2
1060.5	12256.5
1061.88	9901.4
1063.53	29880.1
1063.87	40158.6
1064.21	36929
1064.53	17058.5
1064.84	216478
1065.17	81859.7
1065.5	17388
1066.16	14371.7
1066.49	11746.9
1068.84	24620.9
1074.51	18076.2
1084.49	13097.8
1087.54	13321
1089.56	15579.2
1089.85	26088.4
1090.18	17397.1
1090.5	13952.1
1094.87	13998.6
1095.2	23640.7
1095.52	21686.4
1095.85	62643.9
1096.18	49014.5
1096.51	17109
1099.18	30446.5
1099.51	16763.5
1100.54	37058.9
1100.88	45801.7
1101.2	32780.6
1101.53	148301
1101.86	257630
1102.19	88451
1102.49	8646.4
1106.22	16861.9
1106.54	26825
1106.88	31780.4
1107.21	20125.8
1107.53	154818
1107.86	75742.2
1113.52	11387.5
1128.18	15136.6
1128.84	11517.5
1131.55	11658.3
1132.21	20613.1
1132.54	43629.1
1133.04	14130.8
1144.55	12746.3
1149.55	13082
1150.2	25147.7
1150.52	16983.1
1152.55	13525.8
1155.23	10280
1155.56	20827.6
1155.88	32297.5
1156.21	31067.4
1156.52	14893.1
1160.58	11242.1
1160.9	30164
1161.23	43307.2
1161.56	26574.5
1161.88	129953
1162.22	67318.2
1162.53	15033.4
1165.53	12948.3
1179.56	14221.8
1182.56	14116.8
1184.9	11347.7
1187.58	17137
1187.91	12132.4
1188.23	24209.1
1188.56	44017.8
1193.25	37853.8
1193.59	32035
1193.93	13525.7
1194.23	158600
1194.57	68302.3
1204.6	11358.5
1206.08	49664.9
1206.56	23614.9
1274.61	57526.2
1275.1	20442.4
1318.12	27345.4
1318.61	13898.3
1340.63	12238
1344.66	11124.2
1345.63	12747.8
1346.63	78994.2
1347.13	32399.1
1355.11	12830.1
1381.17	12039.7
1381.63	23743.4
1388.71	14973.8
1390.15	122047
1390.64	35747.5
1404.65	18832.3
1438.65	28572.5
1439.16	16388.1
1445.23	12185.3
1445.69	34466
1446.19	16460
1446.69	17312.8
1447.17	162492
1447.67	56337.4
1448.16	12107
1454.18	17015.8
1454.66	10320.9
1494.75	11540.7
1495.2	17546
1497.68	13975.1
1502.25	13247.9
1502.71	10999.1
1503.71	91664.5
1504.22	29436.7
1509.71	13980.7
1529.71	14075.6
1538.21	40113.3
1538.71	49706.6
1539.22	20099.4
1545.25	27863
1545.75	39215.6
1546.26	23332.1
1546.75	22590.3
1547.23	261530
1547.73	122097
1548.25	18686.3
1587.74	15391.9
1588.25	17442.6
1588.75	15024.1
1595.29	15691.2
1595.8	13413
1596.28	12972.2
1596.76	143122
1597.27	55427.3
1652.27	33679.6
1660.79	37550.3
1661.31	19995.6

[truncated: 15 more sheets: Cell_ING4_W221, Cell_MORC3_W410_1, Cell_MORC3_W410_2, Cell_CBX1_W42, Cell_CBX5_W41, Cell_CBX3_W51, Cell_MPP8_W80, Cell_BRWD3_W1062 or W1063_1, Cell_BRWD3_W1062 or W1063_2, Cell_BRWD3_W1062 or W1063_3, Cell_BRWD3_W1062 or W1063_4, Cell_BRWD3_W1062 or W1063_5, Cell_BRWD3_W1100_1, Cell_BRWD3_W1100_2, Cell_BRWD3_W1100_3]
